# Supplementary material
Source: PubMed Central journal article supplement (PMC5332297)
Supplement: NIHMS835009-supplement-supplement_1.pdf [file NIHMS835009-supplement-supplement_1.pdf]

Tran et al.

Isoprostanes in children

**Supplemental Table**

Supplemental Table S1: Cross sectional associations of urinary isoprostane concentrations with physical measures of child body mass at 5, 9 and 14 years of age

| Age | BMI               |         | BMI-Z score       |         | Waist Circumference |         |
|-----|-------------------|---------|-------------------|---------|---------------------|---------|
|     | $\beta$ (95%CI)   | P-value | $\beta$ (95%CI)   | P-value | $\beta$ (95%CI)     | P-value |
| 5   | -0.28(-0.89,0.34) | 0.38    | -0.02(-0.05,0.02) | 0.43    | -0.26(-1.05,0.52)   | 0.51    |
| 9   | -0.23(-0.61,0.16) | 0.25    | -0.03(-0.06,0.01) | 0.12    | -0.32(-0.85,0.21)   | 0.23    |
| 14  | 0.3(-0.21,0.81)   | 0.25    | 0.02(-0.03,0.07)  | 0.41    | 0.6(-0.21,1.41)     | 0.14    |

8-isoprostane values were log transformed and creatinine corrected prior to analysis.  
All models adjusted for sex.
